# Supplementary material for: Frequency and component analysis of contaminants generated in preparation of anticancer agents using closed system drug transfer devices (CSTDs)
Source: Sci Rep. 2022 Jan 7;12:139. doi: 10.1038/s41598-021-03780-0 (PMC8741972; doi:10.1038/s41598-021-03780-0)
Supplement: Supplementary file 1 — Supplementary Table S1. [file 41598_2021_3780_MOESM1_ESM.docx]

**Frequency and component analysis of contaminants generated in preparation of anticancer agents using Closed system drug transfer devices (CSTDs)**

Satomi Sumikawa1, Yoshihiro Yakushijin2*, Kenjiro Aogi3, Takuya Yano4, Hiroki Hashimoto5, Chiyuki Tsukui6, Tadashi Noguchi7, Taro Shiraishi8, Yasuhiro Horikawa9, Yasuo Yasuoka10, Akihiro Tanaka11, Noriaki Hidaka1 and Mamoru Tanaka1

**Supporting information**

**Table S1.** Information on pharmacists engaged in the preparation of anticancer agents.
